# Supplementary material for: Faecal egg count reduction tests and nemabiome analysis reveal high frequency of multi-resistant parasites on sheep farms in north-east Germany involving multiple strongyle parasite species
Source: PubMed Central journal article supplement (PMC11097076; doi:10.1016/j.ijpddr.2024.100547), 2024-05-05
Supplement: mmc1.pdf [file mmc1.pdf]

**Table S1**

## Primer sequences

| Primer name | Sequence (5'→3')                                         |
|-------------|----------------------------------------------------------|
| NC1Adp      | TCGTCGGCAGCGTCAGATGTGTATAAGAGACAGACGTCTGGTTCAGGGTTGTT    |
| NC1Adp1N    | TCGTCGGCAGCGTCAGATGTGTATAAGAGACAGNACGTCTGGTTCAGGGTTGTT   |
| NC1Adp2N    | TCGTCGGCAGCGTCAGATGTGTATAAGAGACAGNNACGTCTGGTTCAGGGTTGTT  |
| NC1Adp3N    | TCGTCGGCAGCGTCAGATGTGTATAAGAGACAGNNNACGTCTGGTTCAGGGTTGTT |
| NC2Adp      | GTCTCGTGGGCTCGGAGATGTGTATAAGAGACAGTTAGTTTCTTTTCCTCCGCT   |
| NC2Adp1N    | GTCTCGTGGGCTCGGAGATGTGTATAAGAGACAGNNTAGTTTCTTTTCCTCCGCT  |
| NC2Adp2N    | GTCTCGTGGGCTCGGAGATGTGTATAAGAGACAGNNTTAGTTTCTTTTCCTCCGCT |
| NC2Adp3N    | GTCTCGTGGGCTCGGAGATGTGTATAAGAGACAGNNNTAGTTTCTTTTCCTCCGCT |
