# Supplementary material for: Faecal egg count reduction tests and nemabiome analysis reveal high frequency of multi-resistant parasites on sheep farms in north-east Germany involving multiple strongyle parasite species
Source: PubMed Central journal article supplement (PMC11097076; doi:10.1016/j.ijpddr.2024.100547), 2024-05-05
Supplement: mmc2.pdf [file mmc2.pdf]

**Table S2**

Overview of farms, treatment groups included in the study, animal numbers and sampling time points.

| Farm no. | Drug tested | Total number of animals on farm | Number of young animals on farm <sup>a</sup> | Day of post-treatment sampling |
|----------|-------------|---------------------------------|----------------------------------------------|--------------------------------|
| 1        | MOX         | 48                              | 20                                           | 14                             |
| 2        | FBZ         | 450                             | 120                                          | 14                             |
| 2        | IVM         |                                 |                                              |                                |
| 2        | MOX         |                                 |                                              |                                |
| 2        | MON         |                                 |                                              |                                |
| 3        | FBZ         | 475                             | 175                                          | 14                             |
| 3        | IVM         |                                 |                                              |                                |
| 3        | MOX         |                                 |                                              |                                |
| 4        | FBZ         | 953                             | 517                                          | 15                             |
| 4        | IVM         |                                 |                                              |                                |
| 4        | MOX         |                                 |                                              |                                |
| 5        | FBZ         | 1180                            | 400                                          | 13                             |
| 5        | IVM         |                                 |                                              |                                |
| 5        | MOX         |                                 |                                              |                                |
| 6        | FBZ         | 200                             | 77                                           | 14                             |
| 6        | IVM         |                                 |                                              |                                |
| 6        | MOX         |                                 |                                              |                                |
| 7        | FBZ         | 2000                            | 400                                          | 13                             |
| 7        | IVM         |                                 |                                              |                                |
| 7        | MOX         |                                 |                                              |                                |
| 8        | MOX         | 56                              | 26                                           | 14                             |
| 9        | FBZ         | 160                             | 70                                           | 14                             |
| 9        | IVM         |                                 |                                              |                                |
| 9        | MOX         |                                 |                                              |                                |
| 10       | FBZ         | 3500                            | 1600                                         | 13                             |
| 10       | IVM         |                                 |                                              |                                |
| 10       | MOX         |                                 |                                              |                                |
| 11       | MOX         | 200                             | 30                                           | 14                             |
| 12       | MOX         | 530                             | 30                                           | 16                             |

<sup>a</sup>One to two years of age.

MOX, moxidectin; FBZ, fenbendazole; IVM, ivermectin; MON, monepantel.
