# Supplementary material for: Faecal egg count reduction tests and nemabiome analysis reveal high frequency of multi-resistant parasites on sheep farms in north-east Germany involving multiple strongyle parasite species
Source: PubMed Central journal article supplement (PMC11097076; doi:10.1016/j.ijpddr.2024.100547), 2024-05-05
Supplement: mmc3.pdf [file mmc3.pdf]

**Table S3**

Farm details and various gastrointestinal-nematode control related management parameters on the tested sheep farms (SF).

| Parameter                                | Farms |      |     |     |     |     |     |     |     |      |      |      |   |
|------------------------------------------|-------|------|-----|-----|-----|-----|-----|-----|-----|------|------|------|---|
|                                          | SF1   | SF2  | SF3 | SF4 | SF5 | SF6 | SF7 | SF8 | SF9 | SF10 | SF11 | SF12 |   |
| Other ruminants <sup>a</sup>             | N     | C, G | N   | N   | N   | N   | N   | N   | N   | N    | N    | N    | G |
| No. sheep                                | 48    | 450  | 475 | 953 | 118 | 200 | 200 | 56  | 160 | 3500 | 200  | 530  |   |
| No. lambs                                | 20    | 60   | 75  | 399 | 250 | 47  | 200 | 10  | 35  | 800  | 15   | 30   |   |
| Always quarantine new animals            | Y     | Y    | Y   | Y   | Y   | Y   | Y   | N   | Y   | N    | Y    | Y    |   |
| Always deworm new animals                | Y     | N    | N   | Y   | Y   | Y   | Y   | Y   | Y   | N    | N    | N    |   |
| Deworming strategy <sup>b</sup>          | R     | R    | R   | R   | I   | R   | R   | R   | R   | R    | R    | R    |   |
| Deworming person <sup>c</sup>            | F     | F    | F   | F   | F   | F   | F   | F   | F=V | F    | F, V | F    |   |
| Deworming planer                         | F     | F    | F   | F   | F   | F   | F   | F   | F   | F    | F    | F    |   |
| Advised planning <sup>d</sup>            | N     | Y    | N   | Y   | Y   | Y   | N   | Y   | N   | Y    | Y    | Y    |   |
| Dose-and-move <sup>d</sup>               | N     | Y    | Y   | Y   | N   | Y   | N   | N   | Y   | Y    | Y    | N    |   |
| All sheep at same timepoint <sup>d</sup> | Y     | Y    | Y   | Y   | N   | Y   | Y   | N   | N   | Y    | Y    | Y    |   |
| No. dewormings lambs/year                | 1     | 2    | 0   | 2   | 0   | 0   | 0-1 | >6  | 1   | 4    | 2    | 3-4  |   |
| No. deworming of older sheep/year        | 1     | 0    | 2   | 2   | 0   | 0   | 1-2 | 1   | 1   | 0    | 0    | 2-5  |   |
| Faecal examinations <sup>d</sup>         | N     | N    | Y   | N   | N   | Y   | N   | Y   | N   | Y    | N    | N    |   |
| Faecal examinations helpful <sup>d</sup> | N     | Y    | Y   | Y   | Y   | Y   | N   | N   | Y   | Y    | Y    | N    |   |
| Weight determination <sup>e</sup>        | S     | E    | E   | E   | E   | E   | E   | E   | E   | S    | E    | E    |   |
| Drugs used <sup>d</sup>                  |       |      |     |     |     |     |     |     |     |      |      |      |   |
| Moxidectin                               | Y     | Y    | N   | Y   | Y   | Y   | Y   | Y   | Y   | Y    | Y    | Y    |   |
| Ivermectin                               | N     | Y    | Y   | N   | Y   | N   | Y   | N   | Y   | Y    | N    | Y    |   |
| Doramectin                               | N     | N    | N   | Y   | N   | N   | N   | N   | N   | Y    | N    | N    |   |
| Fenbendazole                             | N     | N    | Y   | N   | N   | Y   | Y   | N   | N   | Y    | N    | N    |   |
| Albendazole                              | N     | N    | Y   | N   | Y   | N   | Y   | N   | N   | Y    | N    | Y    |   |
| Levamisole                               | N     | N    | N   | N   | Y   | N   | N   | N   | N   | N    | N    | Y    |   |
| Monepantel                               | N     | N    | N   | N   | Y   | N   | N   | N   | N   | N    | N    | Y    |   |

<sup>a</sup>C, cattle; G, goats; N, none.

<sup>b</sup>R, regularly; I, if required.

<sup>c</sup>F, farmer; V, veterinarian.

<sup>d</sup>Y, yes; N, no.

<sup>e</sup>S, Scale; E, estimate.
