# Supplementary material for: Faecal egg count reduction tests and nemabiome analysis reveal high frequency of multi-resistant parasites on sheep farms in north-east Germany involving multiple strongyle parasite species
Source: PubMed Central journal article supplement (PMC11097076; doi:10.1016/j.ijpddr.2024.100547), 2024-05-05

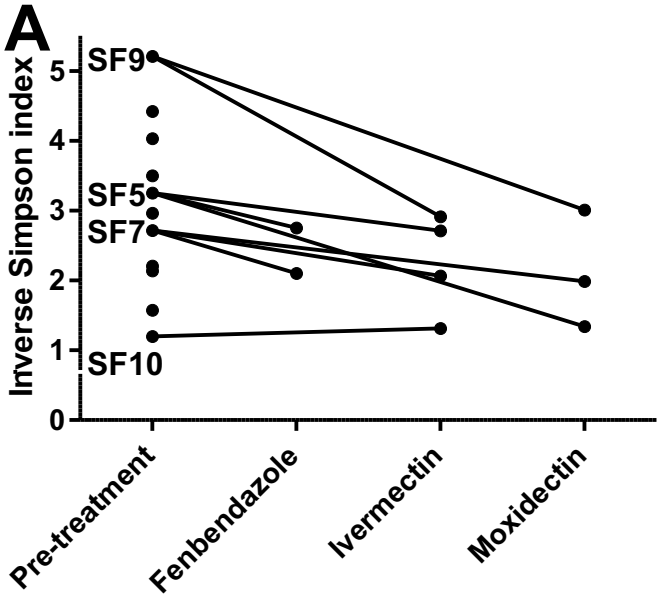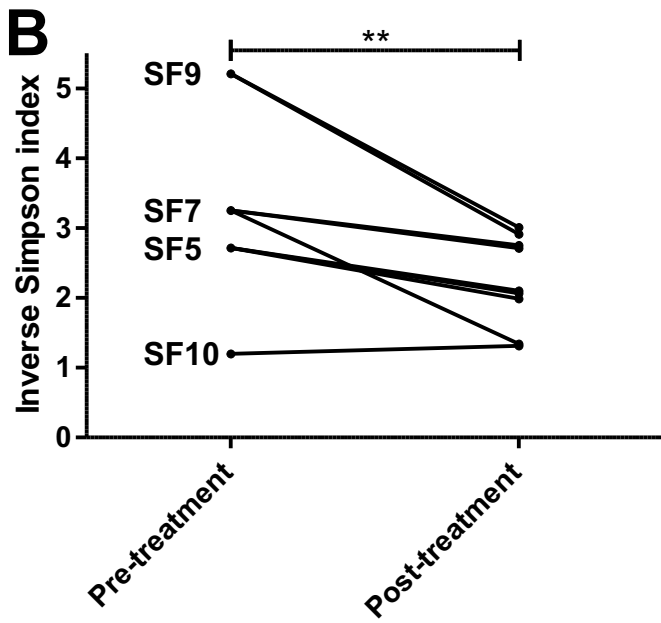

Supplement: mmc5.pdf [file mmc5.pdf]
